# Supplementary material for: Development of multi-channel carbon nanofibers as effective electrosorptive electrodes for a capacitive deionization process
Source: Royal Society of Chemistry journal article supplement (doi:10.1039/c3ta12450a), 2013-01-01
Supplement: c3ta12450a.pdf [file c3ta12450a.pdf]

# Development of Multi-channels Carbon Nanofibers as Effective Electrosorptive Electrodes for Capacitive Deionization Process

Ahmed G. El-Deen, Nasser A. M. Barakat, Khalil Abdelrazek Khalil, and Hak Yong Kim

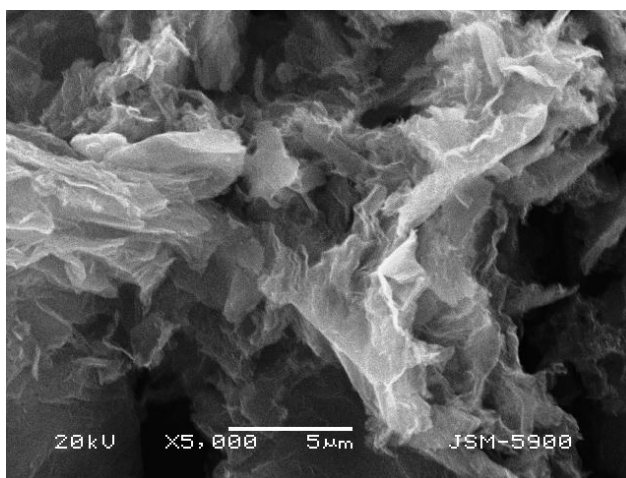

**S1 SEM images of the exfoliated graphene oxide nanosheets.**

**Table S1: XPS elemental analysis of Graphene Oxide and Reduced graphene Oxide**

| Sample | Carbon % | Oxygen % | Nitrogen % | C/O ratio |
|--------|----------|----------|------------|-----------|
| GO     | 68.8     | 31.2     | 0.00       | 2.20      |
| rGO    | 88.14    | 9.6      | 2.24       | 9.18      |

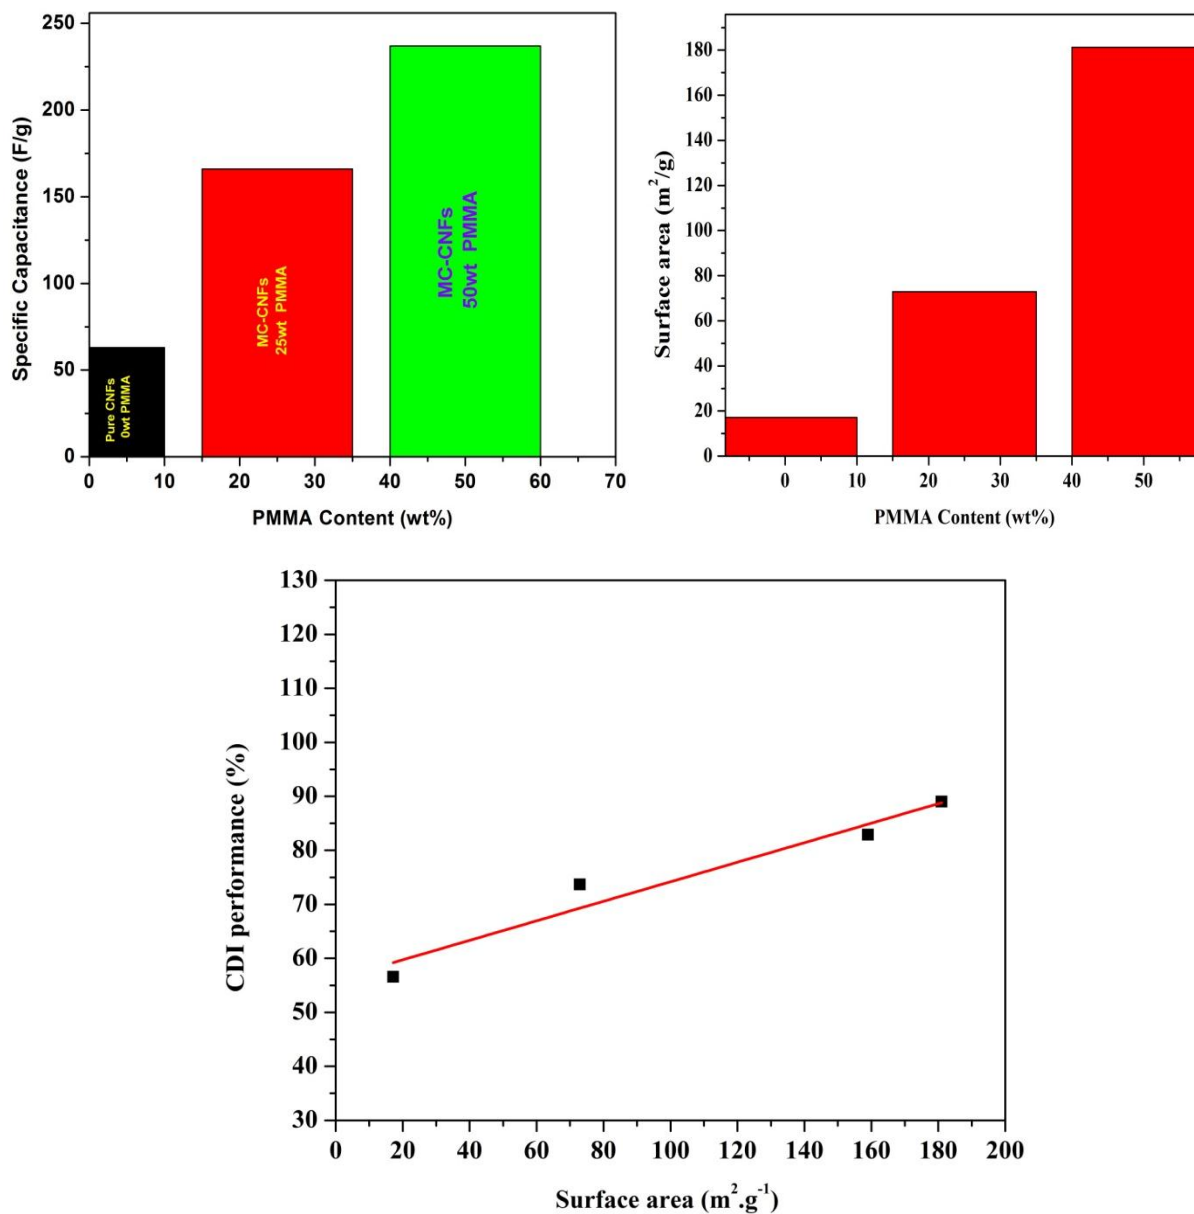

**S.2 Effect of PMMA content in the introduced nanofibers on the specific capacitance; (A) and surface area; (B). Panel C displays the influence of the surface area of the introduced carbon nanofibers on the CDI performance**

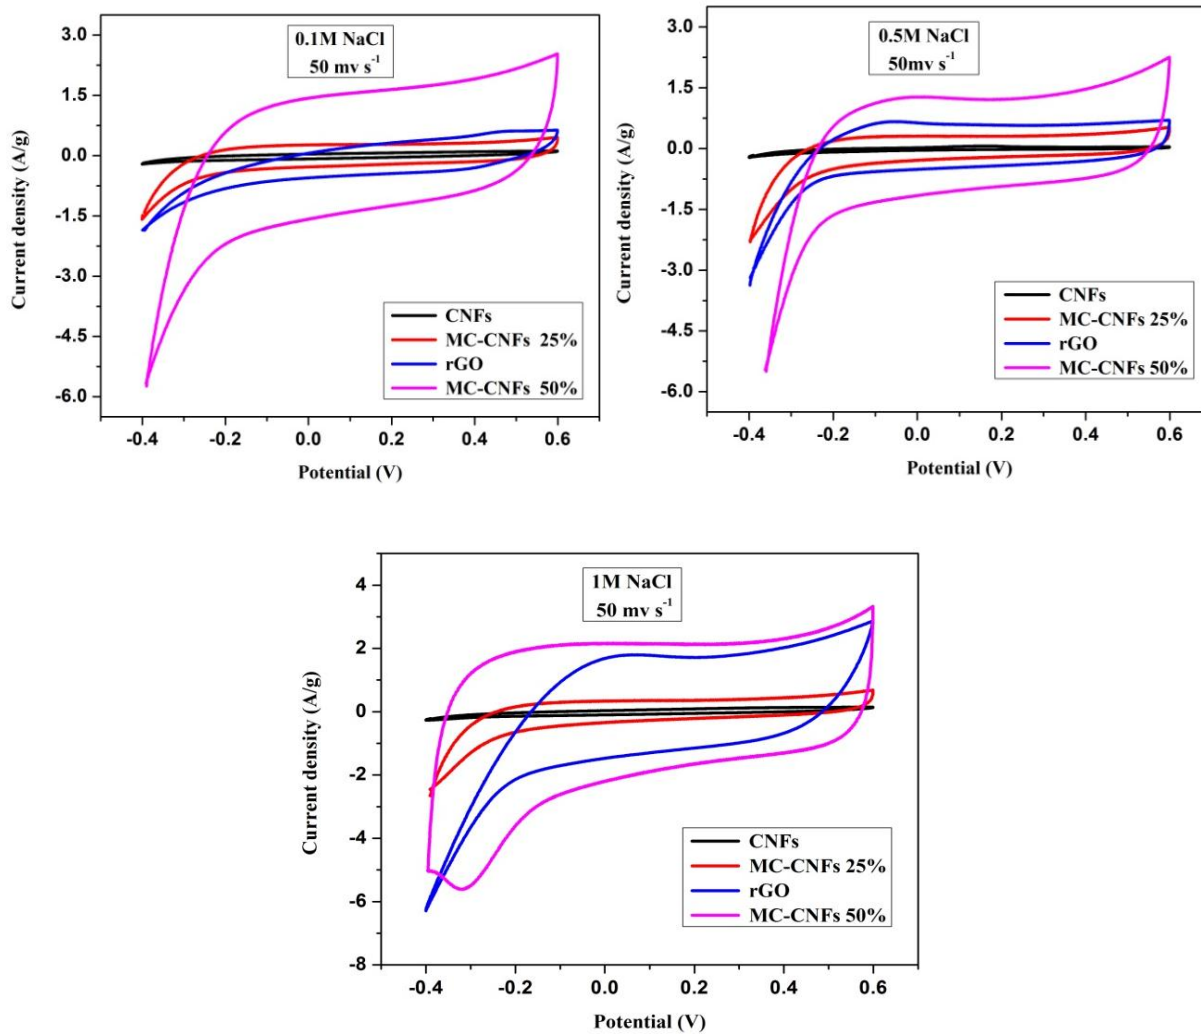

**S.3 Cyclic voltammetry results for the prepared materials at 0.1,0.5 and 1M NaCl concentration with sweep rat 50 mV/s.**

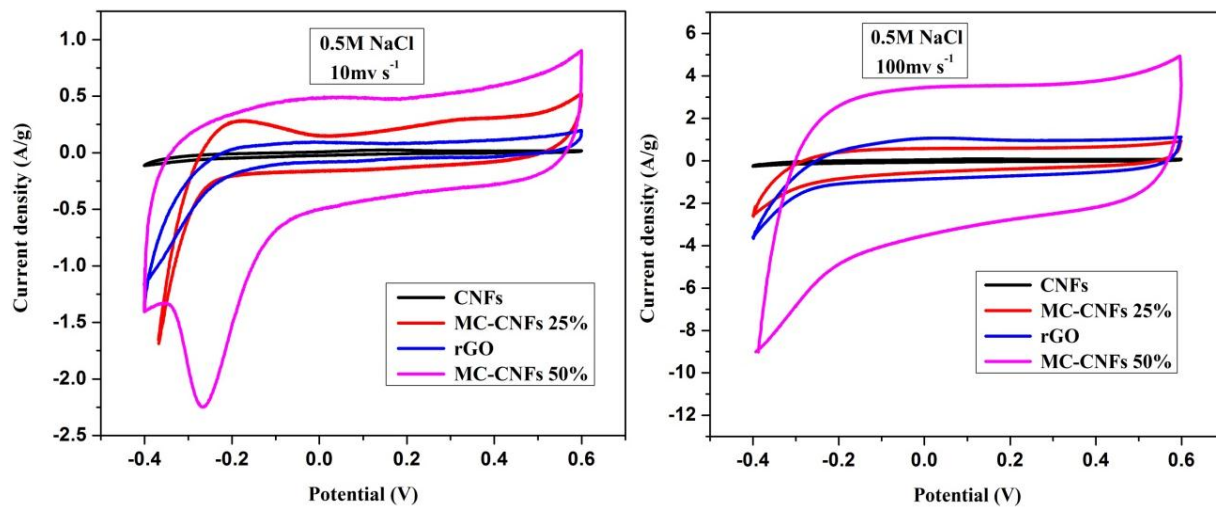

**S.4 Cyclic voltammetry results for the prepared materials at 0.5M NaCl concentration with 10 and 50 mV/s sweep rat.**
